# Supplementary material for: Rationale and design of the validation of bladder health instrument for evaluation in women (VIEW) protocol
Source: PubMed Central journal article supplement (PMC7789348; doi:10.1186/s12905-020-01136-w), 2021-01-07
Supplement: 12905_2020_1136_MOESM1_ESM.pdf [file 12905_2020_1136_MOESM1_ESM.pdf]

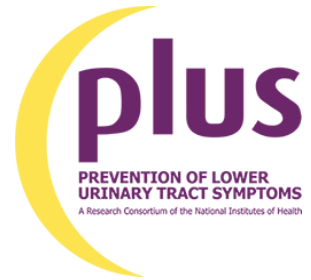

# 2-DAY BLADDER HEALTH SYMPTOM DIARY

***PLEASE COMPLETE THIS DIARY FIRST***

Participant ID:

**Instructions for completing diary**

Please complete the 2-Day Bladder Health Symptom Diary BEFORE completing the 1-Day Frequency-Volume Bladder Diary. For two days, we are asking you to record every time you pee or leak urine, as well as your experiences when peeing and after peeing. The two days you record on the 2-Day Symptom Diary should be done on two days in a row.

Choose any 2 days (48-hour period of time) to keep this Diary. You will need to take this Diary with you when you are at home, work or other locations to record your symptoms every time you pee (urinate).

**TO COMPLETE THE DIARY:**

**Begin your Diary with the FIRST time you pee after you wake up from sleep.**

**Questions 1-8:** Complete the questions about your health and your bladder.

**At the Start of Each Day:** Record the time you get up for the day.

**COLUMN 1:**

- Every time you pee or if you leak urine (even a drop), please check one of the boxes; P=Peed or L=Leaked. If you both leaked urine and peed, check the box marked “B” for Both.

**COLUMN 2:**

- Write down the time you peed in this column and check the box for AM or PM.

**COLUMN 3:**

- If you leaked pee, check if the amount was a small (S), medium (M), or large (L) leakage.

**Column 4 – Column 6:**

- Check Yes (Y) or No (N) for each question about any bladder urgency, your pee experience, and your after-pee experience.

**At the End of Each Day:**

- Check Yes (Y) or No (N) if you had an uncomfortable or painful pee sensation or if you experienced pain while holding urine.
- Answer whether this was a typical or normal day for you. If it was not, record why in the box.
- Record the time you go to bed.

**EXAMPLE:**

| Column 1<br>Peed                                                                                                         | Column 2<br>Time of Pee or Leak                                                                | Column 3<br>Accidental Leak                                                                                                                                       | Column 4<br>Urgency                                                                                     | Column 5<br>Pee Experience                                                                                                                                                      | Column 6<br>After-Pee Experience                                                                                                                                                                                                                                                                                  |
|--------------------------------------------------------------------------------------------------------------------------|------------------------------------------------------------------------------------------------|-------------------------------------------------------------------------------------------------------------------------------------------------------------------|---------------------------------------------------------------------------------------------------------|---------------------------------------------------------------------------------------------------------------------------------------------------------------------------------|-------------------------------------------------------------------------------------------------------------------------------------------------------------------------------------------------------------------------------------------------------------------------------------------------------------------|
| Check Pee or Leak or Both<br><input type="checkbox"/> P <input type="checkbox"/> L <input checked="" type="checkbox"/> B | Time of Pee or Leak<br>5:35 <input checked="" type="checkbox"/> AM <input type="checkbox"/> PM | Amount of Pee Leakage (check one if leak)<br><input type="checkbox"/> Small (S) <input checked="" type="checkbox"/> Medium (M) <input type="checkbox"/> Large (L) | Had a sudden and urgent need to pee<br><input type="checkbox"/> Y <input checked="" type="checkbox"/> N | Easy starting to pee <input checked="" type="checkbox"/> Y <input type="checkbox"/> N<br>Continuous pee stream <input checked="" type="checkbox"/> Y <input type="checkbox"/> N | Do you feel bladder is empty? <input type="checkbox"/> Y <input checked="" type="checkbox"/> N<br>Is the "need to pee feeling" gone? <input type="checkbox"/> Y <input checked="" type="checkbox"/> N<br>Did you dribble pee when you were done? <input checked="" type="checkbox"/> Y <input type="checkbox"/> N |

**Please complete the following questions.**

1. Please enter today's date:

|                      |                      |   |                      |                      |   |                      |                      |                      |                      |
|----------------------|----------------------|---|----------------------|----------------------|---|----------------------|----------------------|----------------------|----------------------|
| <input type="text"/> | <input type="text"/> | / | <input type="text"/> | <input type="text"/> | / | <input type="text"/> | <input type="text"/> | <input type="text"/> | <input type="text"/> |
| M                    | M                    |   | D                    | D                    |   | 2                    | 0                    |                      |                      |
|                      |                      |   |                      |                      |   | Y                    | Y                    | Y                    | Y                    |

2. In general, would you say your health is:

- Excellent
- Very good
- Good
- Fair
- Poor

3. Are you breastfeeding?

- Yes
- No

4. Do you think you have a bladder infection or UTI today?

- Yes
- No

5. Are you pregnant?

- Yes
- No

6. Are you having any respiratory issues (such as a cold or allergies) today?

- Yes
- No

7. Are you catheterized?

- Yes
- No

8. Have you been hospitalized in the past week?

- Yes
- No

Participant ID:

**DAY 1**

**DAY 1**

What time did you get up today?  :   AM  PM

|    | Column 1                                                                                                          | Column 2                                                                                                 | Column 3                                                                                                                                                                                                                                                                                                                                                          | Column 4                                                                                                                                              | Column 5                                              | Column 6                                              |                                                       |                                                       |                                                                     |
|----|-------------------------------------------------------------------------------------------------------------------|----------------------------------------------------------------------------------------------------------|-------------------------------------------------------------------------------------------------------------------------------------------------------------------------------------------------------------------------------------------------------------------------------------------------------------------------------------------------------------------|-------------------------------------------------------------------------------------------------------------------------------------------------------|-------------------------------------------------------|-------------------------------------------------------|-------------------------------------------------------|-------------------------------------------------------|---------------------------------------------------------------------|
|    | Peed                                                                                                              | Time of Pee or Leak                                                                                      | Accidental Leak or Lost Control of Pee                                                                                                                                                                                                                                                                                                                            | Urgency                                                                                                                                               | Pee Experience                                        |                                                       | After-Pee Experience                                  |                                                       |                                                                     |
|    | <br>Check Pee<br>or Leak or Both | <br>Time of Pee or Leak | Amount of Pee Leakage<br>(check one if leak, even just a drop or two)<br> Small (S)    Medium (M)    Large (L) | <br>A sudden and urgent<br>need to pee, that<br>"gotta go" feeling | Easy starting<br>to pee                               | Continuous<br>pee stream                              | Do you feel<br>bladder is<br>empty?                   | Is the<br>"need to pee<br>feeling" gone?              | Did you dribble<br>pee, even a few<br>drops, when you<br>were done? |
| 1  | <input type="checkbox"/> P <input type="checkbox"/> L <input type="checkbox"/> B                                  | <input type="text"/> : <input type="text"/> <input type="checkbox"/> AM <input type="checkbox"/> PM      | <input type="checkbox"/> S <input type="checkbox"/> M <input type="checkbox"/> L                                                                                                                                                                                                                                                                                  | <input type="checkbox"/> Y <input type="checkbox"/> N                                                                                                 | <input type="checkbox"/> Y <input type="checkbox"/> N | <input type="checkbox"/> Y <input type="checkbox"/> N | <input type="checkbox"/> Y <input type="checkbox"/> N | <input type="checkbox"/> Y <input type="checkbox"/> N | <input type="checkbox"/> Y <input type="checkbox"/> N               |
| 2  | <input type="checkbox"/> P <input type="checkbox"/> L <input type="checkbox"/> B                                  | <input type="text"/> : <input type="text"/> <input type="checkbox"/> AM <input type="checkbox"/> PM      | <input type="checkbox"/> S <input type="checkbox"/> M <input type="checkbox"/> L                                                                                                                                                                                                                                                                                  | <input type="checkbox"/> Y <input type="checkbox"/> N                                                                                                 | <input type="checkbox"/> Y <input type="checkbox"/> N | <input type="checkbox"/> Y <input type="checkbox"/> N | <input type="checkbox"/> Y <input type="checkbox"/> N | <input type="checkbox"/> Y <input type="checkbox"/> N | <input type="checkbox"/> Y <input type="checkbox"/> N               |
| 3  | <input type="checkbox"/> P <input type="checkbox"/> L <input type="checkbox"/> B                                  | <input type="text"/> : <input type="text"/> <input type="checkbox"/> AM <input type="checkbox"/> PM      | <input type="checkbox"/> S <input type="checkbox"/> M <input type="checkbox"/> L                                                                                                                                                                                                                                                                                  | <input type="checkbox"/> Y <input type="checkbox"/> N                                                                                                 | <input type="checkbox"/> Y <input type="checkbox"/> N | <input type="checkbox"/> Y <input type="checkbox"/> N | <input type="checkbox"/> Y <input type="checkbox"/> N | <input type="checkbox"/> Y <input type="checkbox"/> N | <input type="checkbox"/> Y <input type="checkbox"/> N               |
| 4  | <input type="checkbox"/> P <input type="checkbox"/> L <input type="checkbox"/> B                                  | <input type="text"/> : <input type="text"/> <input type="checkbox"/> AM <input type="checkbox"/> PM      | <input type="checkbox"/> S <input type="checkbox"/> M <input type="checkbox"/> L                                                                                                                                                                                                                                                                                  | <input type="checkbox"/> Y <input type="checkbox"/> N                                                                                                 | <input type="checkbox"/> Y <input type="checkbox"/> N | <input type="checkbox"/> Y <input type="checkbox"/> N | <input type="checkbox"/> Y <input type="checkbox"/> N | <input type="checkbox"/> Y <input type="checkbox"/> N | <input type="checkbox"/> Y <input type="checkbox"/> N               |
| 5  | <input type="checkbox"/> P <input type="checkbox"/> L <input type="checkbox"/> B                                  | <input type="text"/> : <input type="text"/> <input type="checkbox"/> AM <input type="checkbox"/> PM      | <input type="checkbox"/> S <input type="checkbox"/> M <input type="checkbox"/> L                                                                                                                                                                                                                                                                                  | <input type="checkbox"/> Y <input type="checkbox"/> N                                                                                                 | <input type="checkbox"/> Y <input type="checkbox"/> N | <input type="checkbox"/> Y <input type="checkbox"/> N | <input type="checkbox"/> Y <input type="checkbox"/> N | <input type="checkbox"/> Y <input type="checkbox"/> N | <input type="checkbox"/> Y <input type="checkbox"/> N               |
| 6  | <input type="checkbox"/> P <input type="checkbox"/> L <input type="checkbox"/> B                                  | <input type="text"/> : <input type="text"/> <input type="checkbox"/> AM <input type="checkbox"/> PM      | <input type="checkbox"/> S <input type="checkbox"/> M <input type="checkbox"/> L                                                                                                                                                                                                                                                                                  | <input type="checkbox"/> Y <input type="checkbox"/> N                                                                                                 | <input type="checkbox"/> Y <input type="checkbox"/> N | <input type="checkbox"/> Y <input type="checkbox"/> N | <input type="checkbox"/> Y <input type="checkbox"/> N | <input type="checkbox"/> Y <input type="checkbox"/> N | <input type="checkbox"/> Y <input type="checkbox"/> N               |
| 7  | <input type="checkbox"/> P <input type="checkbox"/> L <input type="checkbox"/> B                                  | <input type="text"/> : <input type="text"/> <input type="checkbox"/> AM <input type="checkbox"/> PM      | <input type="checkbox"/> S <input type="checkbox"/> M <input type="checkbox"/> L                                                                                                                                                                                                                                                                                  | <input type="checkbox"/> Y <input type="checkbox"/> N                                                                                                 | <input type="checkbox"/> Y <input type="checkbox"/> N | <input type="checkbox"/> Y <input type="checkbox"/> N | <input type="checkbox"/> Y <input type="checkbox"/> N | <input type="checkbox"/> Y <input type="checkbox"/> N | <input type="checkbox"/> Y <input type="checkbox"/> N               |
| 8  | <input type="checkbox"/> P <input type="checkbox"/> L <input type="checkbox"/> B                                  | <input type="text"/> : <input type="text"/> <input type="checkbox"/> AM <input type="checkbox"/> PM      | <input type="checkbox"/> S <input type="checkbox"/> M <input type="checkbox"/> L                                                                                                                                                                                                                                                                                  | <input type="checkbox"/> Y <input type="checkbox"/> N                                                                                                 | <input type="checkbox"/> Y <input type="checkbox"/> N | <input type="checkbox"/> Y <input type="checkbox"/> N | <input type="checkbox"/> Y <input type="checkbox"/> N | <input type="checkbox"/> Y <input type="checkbox"/> N | <input type="checkbox"/> Y <input type="checkbox"/> N               |
| 9  | <input type="checkbox"/> P <input type="checkbox"/> L <input type="checkbox"/> B                                  | <input type="text"/> : <input type="text"/> <input type="checkbox"/> AM <input type="checkbox"/> PM      | <input type="checkbox"/> S <input type="checkbox"/> M <input type="checkbox"/> L                                                                                                                                                                                                                                                                                  | <input type="checkbox"/> Y <input type="checkbox"/> N                                                                                                 | <input type="checkbox"/> Y <input type="checkbox"/> N | <input type="checkbox"/> Y <input type="checkbox"/> N | <input type="checkbox"/> Y <input type="checkbox"/> N | <input type="checkbox"/> Y <input type="checkbox"/> N | <input type="checkbox"/> Y <input type="checkbox"/> N               |
| 10 | <input type="checkbox"/> P <input type="checkbox"/> L <input type="checkbox"/> B                                  | <input type="text"/> : <input type="text"/> <input type="checkbox"/> AM <input type="checkbox"/> PM      | <input type="checkbox"/> S <input type="checkbox"/> M <input type="checkbox"/> L                                                                                                                                                                                                                                                                                  | <input type="checkbox"/> Y <input type="checkbox"/> N                                                                                                 | <input type="checkbox"/> Y <input type="checkbox"/> N | <input type="checkbox"/> Y <input type="checkbox"/> N | <input type="checkbox"/> Y <input type="checkbox"/> N | <input type="checkbox"/> Y <input type="checkbox"/> N | <input type="checkbox"/> Y <input type="checkbox"/> N               |
| 11 | <input type="checkbox"/> P <input type="checkbox"/> L <input type="checkbox"/> B                                  | <input type="text"/> : <input type="text"/> <input type="checkbox"/> AM <input type="checkbox"/> PM      | <input type="checkbox"/> S <input type="checkbox"/> M <input type="checkbox"/> L                                                                                                                                                                                                                                                                                  | <input type="checkbox"/> Y <input type="checkbox"/> N                                                                                                 | <input type="checkbox"/> Y <input type="checkbox"/> N | <input type="checkbox"/> Y <input type="checkbox"/> N | <input type="checkbox"/> Y <input type="checkbox"/> N | <input type="checkbox"/> Y <input type="checkbox"/> N | <input type="checkbox"/> Y <input type="checkbox"/> N               |
| 12 | <input type="checkbox"/> P <input type="checkbox"/> L <input type="checkbox"/> B                                  | <input type="text"/> : <input type="text"/> <input type="checkbox"/> AM <input type="checkbox"/> PM      | <input type="checkbox"/> S <input type="checkbox"/> M <input type="checkbox"/> L                                                                                                                                                                                                                                                                                  | <input type="checkbox"/> Y <input type="checkbox"/> N                                                                                                 | <input type="checkbox"/> Y <input type="checkbox"/> N | <input type="checkbox"/> Y <input type="checkbox"/> N | <input type="checkbox"/> Y <input type="checkbox"/> N | <input type="checkbox"/> Y <input type="checkbox"/> N | <input type="checkbox"/> Y <input type="checkbox"/> N               |
| 13 | <input type="checkbox"/> P <input type="checkbox"/> L <input type="checkbox"/> B                                  | <input type="text"/> : <input type="text"/> <input type="checkbox"/> AM <input type="checkbox"/> PM      | <input type="checkbox"/> S <input type="checkbox"/> M <input type="checkbox"/> L                                                                                                                                                                                                                                                                                  | <input type="checkbox"/> Y <input type="checkbox"/> N                                                                                                 | <input type="checkbox"/> Y <input type="checkbox"/> N | <input type="checkbox"/> Y <input type="checkbox"/> N | <input type="checkbox"/> Y <input type="checkbox"/> N | <input type="checkbox"/> Y <input type="checkbox"/> N | <input type="checkbox"/> Y <input type="checkbox"/> N               |
| 14 | <input type="checkbox"/> P <input type="checkbox"/> L <input type="checkbox"/> B                                  | <input type="text"/> : <input type="text"/> <input type="checkbox"/> AM <input type="checkbox"/> PM      | <input type="checkbox"/> S <input type="checkbox"/> M <input type="checkbox"/> L                                                                                                                                                                                                                                                                                  | <input type="checkbox"/> Y <input type="checkbox"/> N                                                                                                 | <input type="checkbox"/> Y <input type="checkbox"/> N | <input type="checkbox"/> Y <input type="checkbox"/> N | <input type="checkbox"/> Y <input type="checkbox"/> N | <input type="checkbox"/> Y <input type="checkbox"/> N | <input type="checkbox"/> Y <input type="checkbox"/> N               |
| 15 | <input type="checkbox"/> P <input type="checkbox"/> L <input type="checkbox"/> B                                  | <input type="text"/> : <input type="text"/> <input type="checkbox"/> AM <input type="checkbox"/> PM      | <input type="checkbox"/> S <input type="checkbox"/> M <input type="checkbox"/> L                                                                                                                                                                                                                                                                                  | <input type="checkbox"/> Y <input type="checkbox"/> N                                                                                                 | <input type="checkbox"/> Y <input type="checkbox"/> N | <input type="checkbox"/> Y <input type="checkbox"/> N | <input type="checkbox"/> Y <input type="checkbox"/> N | <input type="checkbox"/> Y <input type="checkbox"/> N | <input type="checkbox"/> Y <input type="checkbox"/> N               |
| 16 | <input type="checkbox"/> P <input type="checkbox"/> L <input type="checkbox"/> B                                  | <input type="text"/> : <input type="text"/> <input type="checkbox"/> AM <input type="checkbox"/> PM      | <input type="checkbox"/> S <input type="checkbox"/> M <input type="checkbox"/> L                                                                                                                                                                                                                                                                                  | <input type="checkbox"/> Y <input type="checkbox"/> N                                                                                                 | <input type="checkbox"/> Y <input type="checkbox"/> N | <input type="checkbox"/> Y <input type="checkbox"/> N | <input type="checkbox"/> Y <input type="checkbox"/> N | <input type="checkbox"/> Y <input type="checkbox"/> N | <input type="checkbox"/> Y <input type="checkbox"/> N               |

Pee sensation uncomfortable or painful?

Yes  No

Did you experience pain while you were holding urine?

Yes  No

What time did you go to bed today?  :   AM  PM

Did this represent a typical or normal day for you?

Yes, normal

No, worse → If no, please state what was different below:

No, better → If no, please state what was different below:

Participant ID:

Participant ID:

**DAY 2**

**DAY 2**

What time did you get up today?  :   AM  PM

|    | Column 1                                                                                                       | Column 2                                                                                                 |                                                         | Column 3                                                                                    |                                                                                              |                                                                                             | Column 4                                                                                                                                        | Column 5                                              |                                                       | Column 6                                              |                                                       |                                                            |
|----|----------------------------------------------------------------------------------------------------------------|----------------------------------------------------------------------------------------------------------|---------------------------------------------------------|---------------------------------------------------------------------------------------------|----------------------------------------------------------------------------------------------|---------------------------------------------------------------------------------------------|-------------------------------------------------------------------------------------------------------------------------------------------------|-------------------------------------------------------|-------------------------------------------------------|-------------------------------------------------------|-------------------------------------------------------|------------------------------------------------------------|
|    | Peed                                                                                                           | Time of Pee or Leak                                                                                      |                                                         | Accidental Leak or Lost Control of Pee                                                      |                                                                                              |                                                                                             | Urgency                                                                                                                                         | Pee Experience                                        |                                                       | After-Pee Experience                                  |                                                       |                                                            |
|    | <br>Check Pee or Leak or Both | <br>Time of Pee or Leak |                                                         | Amount of Pee Leakage<br>(check one if leak, even just a drop or two)                       |                                                                                              |                                                                                             | <br>A sudden and urgent need to pee, that "gotta go" feeling | Easy starting to pee                                  | Continuous pee stream                                 | Do you feel bladder is empty?                         | Is the "need to pee feeling" gone?                    | Did you dribble pee, even a few drops, when you were done? |
|    | <input type="checkbox"/> P <input type="checkbox"/> L <input type="checkbox"/> B                               | <input type="checkbox"/> AM <input type="checkbox"/> PM                                                  | <input type="checkbox"/> AM <input type="checkbox"/> PM |  Small (S) |  Medium (M) |  Large (L) | <input type="checkbox"/> Y <input type="checkbox"/> N                                                                                           | <input type="checkbox"/> Y <input type="checkbox"/> N | <input type="checkbox"/> Y <input type="checkbox"/> N | <input type="checkbox"/> Y <input type="checkbox"/> N | <input type="checkbox"/> Y <input type="checkbox"/> N | <input type="checkbox"/> Y <input type="checkbox"/> N      |
| 17 | <input type="checkbox"/> P <input type="checkbox"/> L <input type="checkbox"/> B                               | <input type="checkbox"/> AM <input type="checkbox"/> PM                                                  | <input type="checkbox"/> AM <input type="checkbox"/> PM | <input type="checkbox"/> S <input type="checkbox"/> M <input type="checkbox"/> L            | <input type="checkbox"/> Y <input type="checkbox"/> N                                        | <input type="checkbox"/> Y <input type="checkbox"/> N                                       | <input type="checkbox"/> Y <input type="checkbox"/> N                                                                                           | <input type="checkbox"/> Y <input type="checkbox"/> N | <input type="checkbox"/> Y <input type="checkbox"/> N | <input type="checkbox"/> Y <input type="checkbox"/> N | <input type="checkbox"/> Y <input type="checkbox"/> N |                                                            |
| 18 | <input type="checkbox"/> P <input type="checkbox"/> L <input type="checkbox"/> B                               | <input type="checkbox"/> AM <input type="checkbox"/> PM                                                  | <input type="checkbox"/> AM <input type="checkbox"/> PM | <input type="checkbox"/> S <input type="checkbox"/> M <input type="checkbox"/> L            | <input type="checkbox"/> Y <input type="checkbox"/> N                                        | <input type="checkbox"/> Y <input type="checkbox"/> N                                       | <input type="checkbox"/> Y <input type="checkbox"/> N                                                                                           | <input type="checkbox"/> Y <input type="checkbox"/> N | <input type="checkbox"/> Y <input type="checkbox"/> N | <input type="checkbox"/> Y <input type="checkbox"/> N | <input type="checkbox"/> Y <input type="checkbox"/> N |                                                            |
| 19 | <input type="checkbox"/> P <input type="checkbox"/> L <input type="checkbox"/> B                               | <input type="checkbox"/> AM <input type="checkbox"/> PM                                                  | <input type="checkbox"/> AM <input type="checkbox"/> PM | <input type="checkbox"/> S <input type="checkbox"/> M <input type="checkbox"/> L            | <input type="checkbox"/> Y <input type="checkbox"/> N                                        | <input type="checkbox"/> Y <input type="checkbox"/> N                                       | <input type="checkbox"/> Y <input type="checkbox"/> N                                                                                           | <input type="checkbox"/> Y <input type="checkbox"/> N | <input type="checkbox"/> Y <input type="checkbox"/> N | <input type="checkbox"/> Y <input type="checkbox"/> N | <input type="checkbox"/> Y <input type="checkbox"/> N |                                                            |
| 20 | <input type="checkbox"/> P <input type="checkbox"/> L <input type="checkbox"/> B                               | <input type="checkbox"/> AM <input type="checkbox"/> PM                                                  | <input type="checkbox"/> AM <input type="checkbox"/> PM | <input type="checkbox"/> S <input type="checkbox"/> M <input type="checkbox"/> L            | <input type="checkbox"/> Y <input type="checkbox"/> N                                        | <input type="checkbox"/> Y <input type="checkbox"/> N                                       | <input type="checkbox"/> Y <input type="checkbox"/> N                                                                                           | <input type="checkbox"/> Y <input type="checkbox"/> N | <input type="checkbox"/> Y <input type="checkbox"/> N | <input type="checkbox"/> Y <input type="checkbox"/> N | <input type="checkbox"/> Y <input type="checkbox"/> N |                                                            |
| 21 | <input type="checkbox"/> P <input type="checkbox"/> L <input type="checkbox"/> B                               | <input type="checkbox"/> AM <input type="checkbox"/> PM                                                  | <input type="checkbox"/> AM <input type="checkbox"/> PM | <input type="checkbox"/> S <input type="checkbox"/> M <input type="checkbox"/> L            | <input type="checkbox"/> Y <input type="checkbox"/> N                                        | <input type="checkbox"/> Y <input type="checkbox"/> N                                       | <input type="checkbox"/> Y <input type="checkbox"/> N                                                                                           | <input type="checkbox"/> Y <input type="checkbox"/> N | <input type="checkbox"/> Y <input type="checkbox"/> N | <input type="checkbox"/> Y <input type="checkbox"/> N | <input type="checkbox"/> Y <input type="checkbox"/> N |                                                            |
| 22 | <input type="checkbox"/> P <input type="checkbox"/> L <input type="checkbox"/> B                               | <input type="checkbox"/> AM <input type="checkbox"/> PM                                                  | <input type="checkbox"/> AM <input type="checkbox"/> PM | <input type="checkbox"/> S <input type="checkbox"/> M <input type="checkbox"/> L            | <input type="checkbox"/> Y <input type="checkbox"/> N                                        | <input type="checkbox"/> Y <input type="checkbox"/> N                                       | <input type="checkbox"/> Y <input type="checkbox"/> N                                                                                           | <input type="checkbox"/> Y <input type="checkbox"/> N | <input type="checkbox"/> Y <input type="checkbox"/> N | <input type="checkbox"/> Y <input type="checkbox"/> N | <input type="checkbox"/> Y <input type="checkbox"/> N |                                                            |
| 23 | <input type="checkbox"/> P <input type="checkbox"/> L <input type="checkbox"/> B                               | <input type="checkbox"/> AM <input type="checkbox"/> PM                                                  | <input type="checkbox"/> AM <input type="checkbox"/> PM | <input type="checkbox"/> S <input type="checkbox"/> M <input type="checkbox"/> L            | <input type="checkbox"/> Y <input type="checkbox"/> N                                        | <input type="checkbox"/> Y <input type="checkbox"/> N                                       | <input type="checkbox"/> Y <input type="checkbox"/> N                                                                                           | <input type="checkbox"/> Y <input type="checkbox"/> N | <input type="checkbox"/> Y <input type="checkbox"/> N | <input type="checkbox"/> Y <input type="checkbox"/> N | <input type="checkbox"/> Y <input type="checkbox"/> N |                                                            |
| 24 | <input type="checkbox"/> P <input type="checkbox"/> L <input type="checkbox"/> B                               | <input type="checkbox"/> AM <input type="checkbox"/> PM                                                  | <input type="checkbox"/> AM <input type="checkbox"/> PM | <input type="checkbox"/> S <input type="checkbox"/> M <input type="checkbox"/> L            | <input type="checkbox"/> Y <input type="checkbox"/> N                                        | <input type="checkbox"/> Y <input type="checkbox"/> N                                       | <input type="checkbox"/> Y <input type="checkbox"/> N                                                                                           | <input type="checkbox"/> Y <input type="checkbox"/> N | <input type="checkbox"/> Y <input type="checkbox"/> N | <input type="checkbox"/> Y <input type="checkbox"/> N | <input type="checkbox"/> Y <input type="checkbox"/> N |                                                            |
| 25 | <input type="checkbox"/> P <input type="checkbox"/> L <input type="checkbox"/> B                               | <input type="checkbox"/> AM <input type="checkbox"/> PM                                                  | <input type="checkbox"/> AM <input type="checkbox"/> PM | <input type="checkbox"/> S <input type="checkbox"/> M <input type="checkbox"/> L            | <input type="checkbox"/> Y <input type="checkbox"/> N                                        | <input type="checkbox"/> Y <input type="checkbox"/> N                                       | <input type="checkbox"/> Y <input type="checkbox"/> N                                                                                           | <input type="checkbox"/> Y <input type="checkbox"/> N | <input type="checkbox"/> Y <input type="checkbox"/> N | <input type="checkbox"/> Y <input type="checkbox"/> N | <input type="checkbox"/> Y <input type="checkbox"/> N |                                                            |
| 26 | <input type="checkbox"/> P <input type="checkbox"/> L <input type="checkbox"/> B                               | <input type="checkbox"/> AM <input type="checkbox"/> PM                                                  | <input type="checkbox"/> AM <input type="checkbox"/> PM | <input type="checkbox"/> S <input type="checkbox"/> M <input type="checkbox"/> L            | <input type="checkbox"/> Y <input type="checkbox"/> N                                        | <input type="checkbox"/> Y <input type="checkbox"/> N                                       | <input type="checkbox"/> Y <input type="checkbox"/> N                                                                                           | <input type="checkbox"/> Y <input type="checkbox"/> N | <input type="checkbox"/> Y <input type="checkbox"/> N | <input type="checkbox"/> Y <input type="checkbox"/> N | <input type="checkbox"/> Y <input type="checkbox"/> N |                                                            |
| 27 | <input type="checkbox"/> P <input type="checkbox"/> L <input type="checkbox"/> B                               | <input type="checkbox"/> AM <input type="checkbox"/> PM                                                  | <input type="checkbox"/> AM <input type="checkbox"/> PM | <input type="checkbox"/> S <input type="checkbox"/> M <input type="checkbox"/> L            | <input type="checkbox"/> Y <input type="checkbox"/> N                                        | <input type="checkbox"/> Y <input type="checkbox"/> N                                       | <input type="checkbox"/> Y <input type="checkbox"/> N                                                                                           | <input type="checkbox"/> Y <input type="checkbox"/> N | <input type="checkbox"/> Y <input type="checkbox"/> N | <input type="checkbox"/> Y <input type="checkbox"/> N | <input type="checkbox"/> Y <input type="checkbox"/> N |                                                            |
| 28 | <input type="checkbox"/> P <input type="checkbox"/> L <input type="checkbox"/> B                               | <input type="checkbox"/> AM <input type="checkbox"/> PM                                                  | <input type="checkbox"/> AM <input type="checkbox"/> PM | <input type="checkbox"/> S <input type="checkbox"/> M <input type="checkbox"/> L            | <input type="checkbox"/> Y <input type="checkbox"/> N                                        | <input type="checkbox"/> Y <input type="checkbox"/> N                                       | <input type="checkbox"/> Y <input type="checkbox"/> N                                                                                           | <input type="checkbox"/> Y <input type="checkbox"/> N | <input type="checkbox"/> Y <input type="checkbox"/> N | <input type="checkbox"/> Y <input type="checkbox"/> N | <input type="checkbox"/> Y <input type="checkbox"/> N |                                                            |
| 29 | <input type="checkbox"/> P <input type="checkbox"/> L <input type="checkbox"/> B                               | <input type="checkbox"/> AM <input type="checkbox"/> PM                                                  | <input type="checkbox"/> AM <input type="checkbox"/> PM | <input type="checkbox"/> S <input type="checkbox"/> M <input type="checkbox"/> L            | <input type="checkbox"/> Y <input type="checkbox"/> N                                        | <input type="checkbox"/> Y <input type="checkbox"/> N                                       | <input type="checkbox"/> Y <input type="checkbox"/> N                                                                                           | <input type="checkbox"/> Y <input type="checkbox"/> N | <input type="checkbox"/> Y <input type="checkbox"/> N | <input type="checkbox"/> Y <input type="checkbox"/> N | <input type="checkbox"/> Y <input type="checkbox"/> N |                                                            |
| 30 | <input type="checkbox"/> P <input type="checkbox"/> L <input type="checkbox"/> B                               | <input type="checkbox"/> AM <input type="checkbox"/> PM                                                  | <input type="checkbox"/> AM <input type="checkbox"/> PM | <input type="checkbox"/> S <input type="checkbox"/> M <input type="checkbox"/> L            | <input type="checkbox"/> Y <input type="checkbox"/> N                                        | <input type="checkbox"/> Y <input type="checkbox"/> N                                       | <input type="checkbox"/> Y <input type="checkbox"/> N                                                                                           | <input type="checkbox"/> Y <input type="checkbox"/> N | <input type="checkbox"/> Y <input type="checkbox"/> N | <input type="checkbox"/> Y <input type="checkbox"/> N | <input type="checkbox"/> Y <input type="checkbox"/> N |                                                            |
| 31 | <input type="checkbox"/> P <input type="checkbox"/> L <input type="checkbox"/> B                               | <input type="checkbox"/> AM <input type="checkbox"/> PM                                                  | <input type="checkbox"/> AM <input type="checkbox"/> PM | <input type="checkbox"/> S <input type="checkbox"/> M <input type="checkbox"/> L            | <input type="checkbox"/> Y <input type="checkbox"/> N                                        | <input type="checkbox"/> Y <input type="checkbox"/> N                                       | <input type="checkbox"/> Y <input type="checkbox"/> N                                                                                           | <input type="checkbox"/> Y <input type="checkbox"/> N | <input type="checkbox"/> Y <input type="checkbox"/> N | <input type="checkbox"/> Y <input type="checkbox"/> N | <input type="checkbox"/> Y <input type="checkbox"/> N |                                                            |
| 32 | <input type="checkbox"/> P <input type="checkbox"/> L <input type="checkbox"/> B                               | <input type="checkbox"/> AM <input type="checkbox"/> PM                                                  | <input type="checkbox"/> AM <input type="checkbox"/> PM | <input type="checkbox"/> S <input type="checkbox"/> M <input type="checkbox"/> L            | <input type="checkbox"/> Y <input type="checkbox"/> N                                        | <input type="checkbox"/> Y <input type="checkbox"/> N                                       | <input type="checkbox"/> Y <input type="checkbox"/> N                                                                                           | <input type="checkbox"/> Y <input type="checkbox"/> N | <input type="checkbox"/> Y <input type="checkbox"/> N | <input type="checkbox"/> Y <input type="checkbox"/> N | <input type="checkbox"/> Y <input type="checkbox"/> N |                                                            |

Pee sensation uncomfortable or painful?

Yes  No

Did you experience pain while you were holding urine?

Yes  No

What time did you go to bed today?  :   AM  PM

Did this represent a typical or normal day for you?

Yes, normal

No, worse → If no, please state what was different below:

No, better → If no, please state what was different below:

Participant ID:

Participant ID:
