# Supplementary material for: Rationale and design of the validation of bladder health instrument for evaluation in women (VIEW) protocol
Source: PubMed Central journal article supplement (PMC7789348; doi:10.1186/s12905-020-01136-w), 2021-01-07
Supplement: 12905_2020_1136_MOESM3_ESM.pdf [file 12905_2020_1136_MOESM3_ESM.pdf]

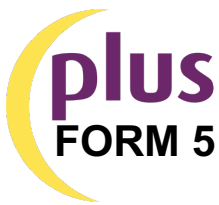

# FORM 5: JUDGE INITIAL RATING

Participant ID: \_\_\_\_\_ - \_\_\_\_\_

Judge ID: \_\_\_\_\_

Date: \_\_\_\_ / \_\_\_\_ / \_\_\_\_  
MM DD YYYY

## Rating Based on Interview

Time you spent in interview: START TIME: \_\_\_\_\_ (24-hour clock) END TIME: \_\_\_\_\_ (24-hour clock)

### Absolute Rating

1. How would you rate the health of this person's bladder? Please enter a rating from 0 – 10 in the textbox below.

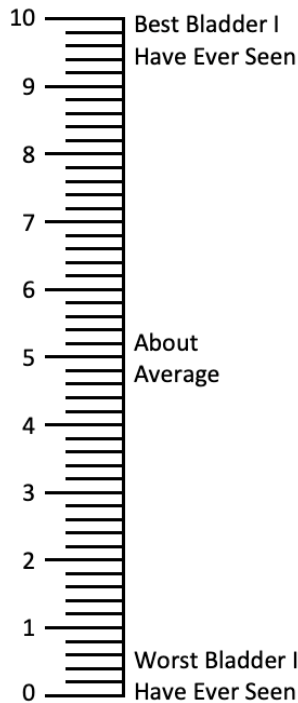

Initial Rating:  
\_\_\_\_\_ . \_\_\_\_\_

2. What are the three primary reasons for this rating?

I: \_\_\_\_\_  
\_\_\_\_\_  
\_\_\_\_\_  
\_\_\_\_\_  
II: \_\_\_\_\_  
\_\_\_\_\_  
\_\_\_\_\_  
\_\_\_\_\_  
III: \_\_\_\_\_  
\_\_\_\_\_  
\_\_\_\_\_  
\_\_\_\_\_

### Adjusted/Relative Rating

1. Compared to other similarly situated women (e.g. age, health status, etc.), how would you rate the health of this person's bladder? Please enter a rating from 0 – 10 in the textbox below.

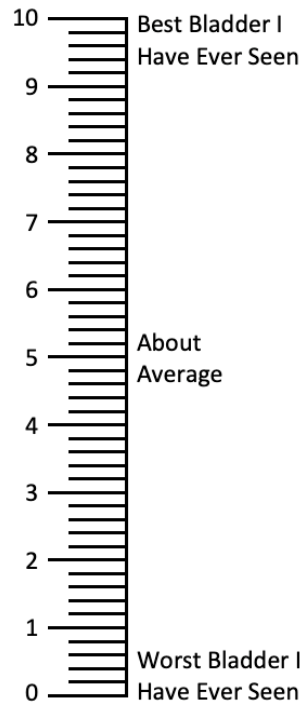

Adjusted Rating:  
\_\_\_\_\_ . \_\_\_\_\_

2. What are the three primary reasons for this rating?

I: \_\_\_\_\_  
\_\_\_\_\_  
\_\_\_\_\_  
\_\_\_\_\_  
II: \_\_\_\_\_  
\_\_\_\_\_  
\_\_\_\_\_  
\_\_\_\_\_  
III: \_\_\_\_\_  
\_\_\_\_\_  
\_\_\_\_\_  
\_\_\_\_\_

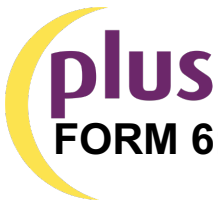

# FORM 6: JUDGE SECOND RATING

Participant ID: \_\_\_\_\_ - \_\_\_\_\_

Judge ID: \_\_\_\_\_

Date: \_\_\_\_ / \_\_\_\_ / \_\_\_\_  
MM DD YYYY

## Rating Based on Interview & Additional Data

Did you access this participant's medical records?

- Yes  No → Was this because you didn't want to or because you didn't have access to the medical records?
- Didn't want to access medical records  Didn't have access to medical records

I need additional information to complete this form → Please complete form when information becomes available.

**For RCs:** Follow up with judge in 30 days. If judge can't make second assessment because of insufficient information, check here:

### Absolute Rating

1. How would you rate the health of this person's bladder? Please enter a rating from 0 – 10 in the textbox below.

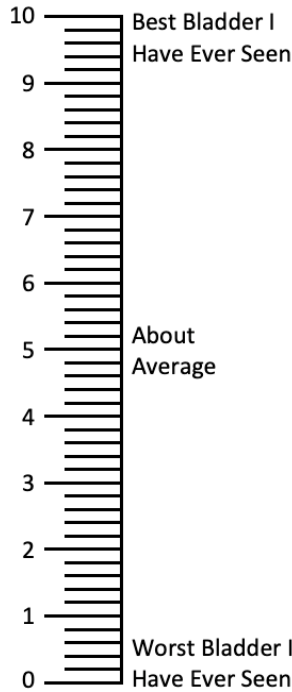

Initial Rating:  
\_\_\_\_ . \_\_\_\_

2. What are the three primary reasons for this rating?

I: \_\_\_\_\_  
 \_\_\_\_\_  
 \_\_\_\_\_

II: \_\_\_\_\_  
 \_\_\_\_\_  
 \_\_\_\_\_

III: \_\_\_\_\_  
 \_\_\_\_\_  
 \_\_\_\_\_

### Adjusted/Relative Rating

1. Compared to other similarly situated women (e.g. age, health status, etc.), how would you rate the health of this person's bladder? Please enter a rating from 0 – 10 in the textbox below.

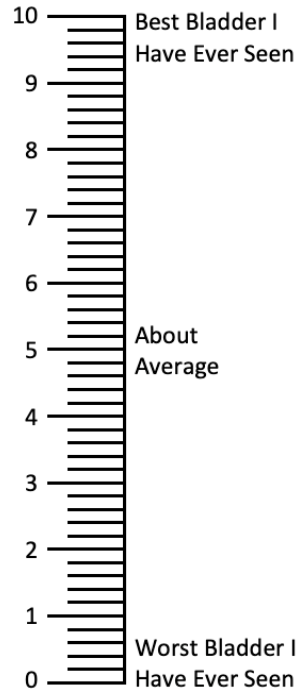

Adjusted Rating:  
\_\_\_\_ . \_\_\_\_

2. What are the three primary reasons for this rating?

I: \_\_\_\_\_  
 \_\_\_\_\_  
 \_\_\_\_\_

II: \_\_\_\_\_  
 \_\_\_\_\_  
 \_\_\_\_\_

III: \_\_\_\_\_  
 \_\_\_\_\_  
 \_\_\_\_\_
